# Supplementary material for: Degradation of Swainsonine by the NADP-Dependent Alcohol Dehydrogenase A1R6C3 in Arthrobacter sp. HW08
Source: MDPI journal article supplement (doi:10.3390/toxins8050145), 2016-05-16
Supplement: s1 [file s1]

## Supplementary Materials: Degradation of Swainsonine by the NADP-Dependent Alcohol Dehydrogenase A1R6C3 in *Arthrobacter* sp. HW08

Yan Wang, A'guan Zhai, Yanqi Zhang, Kai Qiu, Jianhua Wang, and Qinfan Li

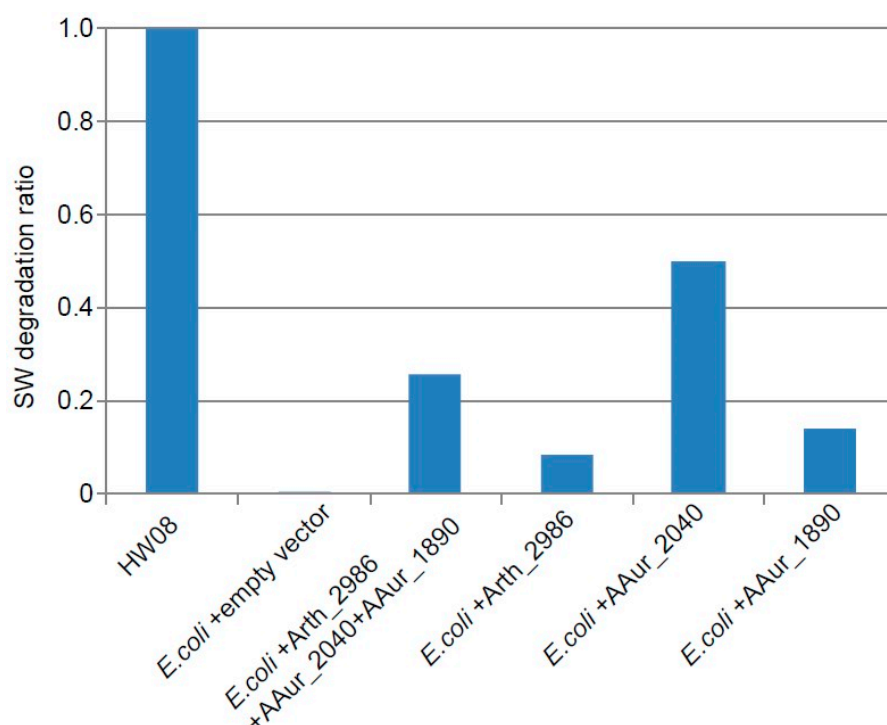

**Figure S1.** SW (Swainsonine) degradation ratio of *E. coli* BL21 (DE3) cells when transformed with pET32 $\alpha$ -AAur\_2040, pET32 $\alpha$ -AAur\_1890, pET32 $\alpha$ -Arth\_2986 or combination after 12 h.
